# Supplementary material
Source: publisher figshare collection journal article supplement (https://frontiersin.figshare.com/ndownloader/files/11494322)
Supplement: Supplementary file [file 11494322]

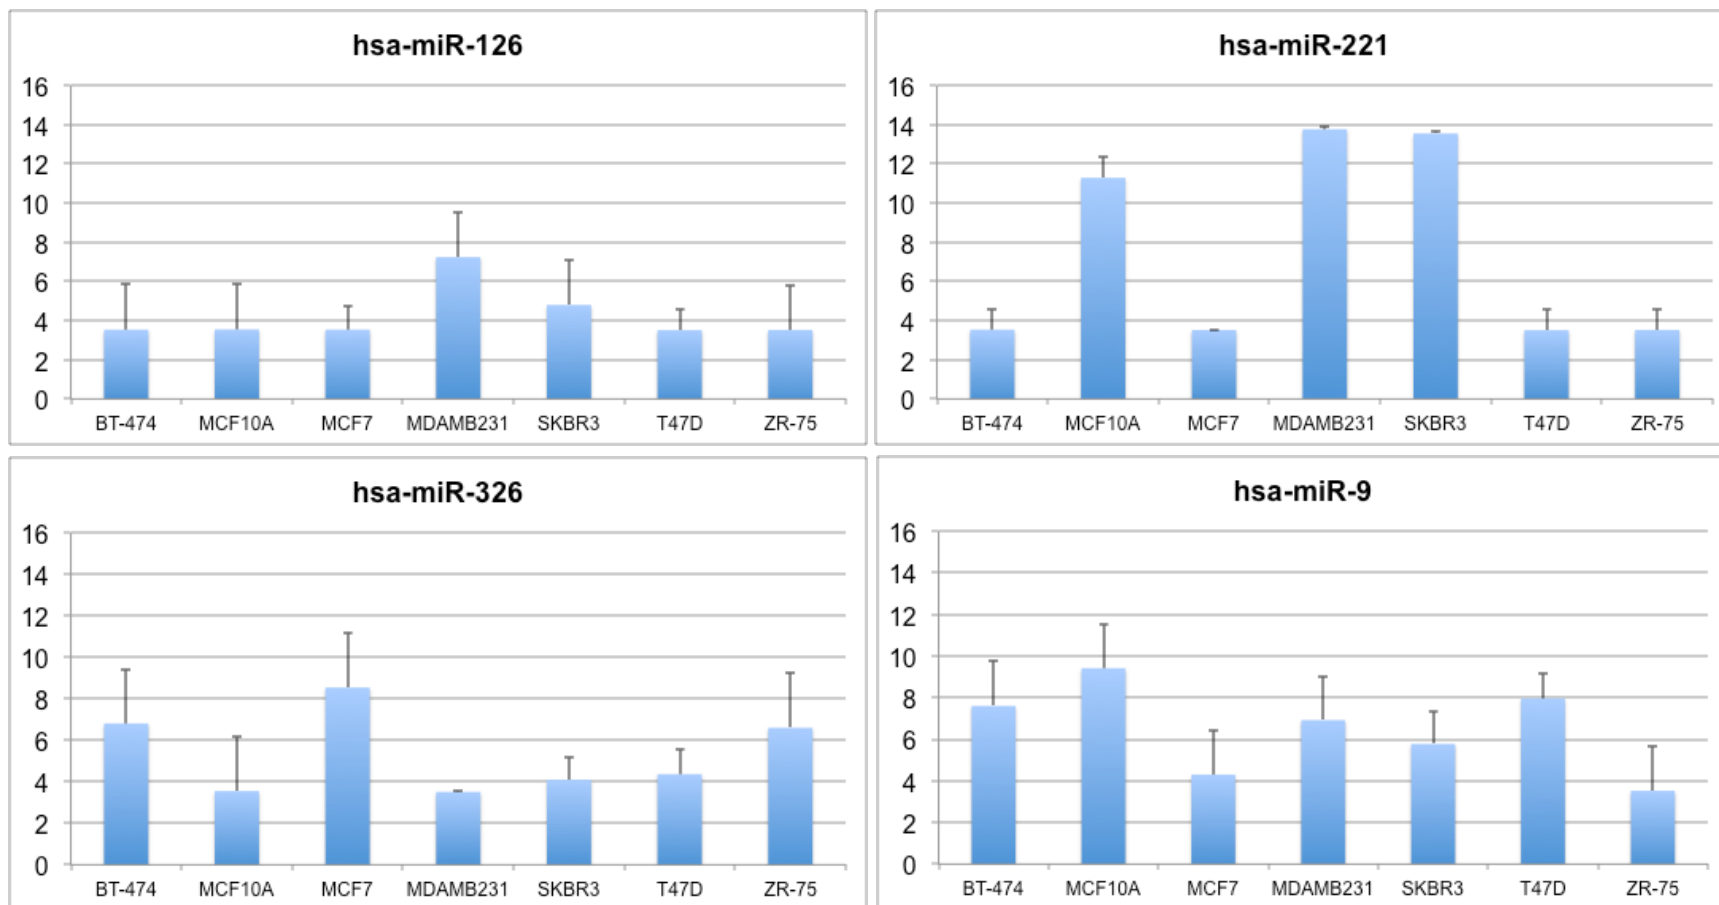

Supplementary Figure 2. The expression of miR-126, miR-326, miR-9 and miR-221 in breast cancer cell lines. The log2 levels of microRNA expression are shown on the Y axis.
